# Supplementary material for: Structural directing roles of isomeric phenylenediacetate ligands in the formation of coordination networks based on flexible N,N′-di(3-pyridyl)suberoamide
Source: Royal Society of Chemistry journal article supplement (doi:10.1039/c4ce01752h), 2014-10-02
Supplement: c4ce01752h1.pdf [file c4ce01752h1.pdf]

## Electronic supplementary information (ESI)

**Structural directing roles of isomeric phenylenediacetate ligands in the formation of coordination networks based on a flexible *N,N'*-di(3-pyridyl)suberoamide. A rare 5-fold cds net and a 1D network with new mode of entanglement.**

Yang-Chih Lo,<sup>a</sup> Wayne Hsu,<sup>a</sup> Hsiu-Yi He,<sup>a</sup>

Stephen T. Hyde,<sup>b\*</sup> Davide M. Proserpio<sup>c,d\*</sup> and Jhy-Der Chen<sup>a\*</sup>

<sup>a</sup>*Department of Chemistry, Chung-Yuan Christian University, Chung-Li, Taiwan, R.O.C.*

<sup>b</sup>*Applied Maths Department, Research School of Physics, Australian National University, Canberra, ACT 0200, Australia*

<sup>c</sup>*Università degli Studi di Milano, Dipartimento di Chimica, Via Golgi 19, 20133 Milano, Italy*

<sup>d</sup>*Samara Center for Theoretical Materials Science (SCTMS), Samara State University, Ac. Pavlov St. 1, Samara 443011, Russia*

**Fig. S1.** Simulated (black) and as synthesized (red) PXRD patterns of complex **1**, and the pattern (blue) of the compound heated at 150 °C for 3hr.

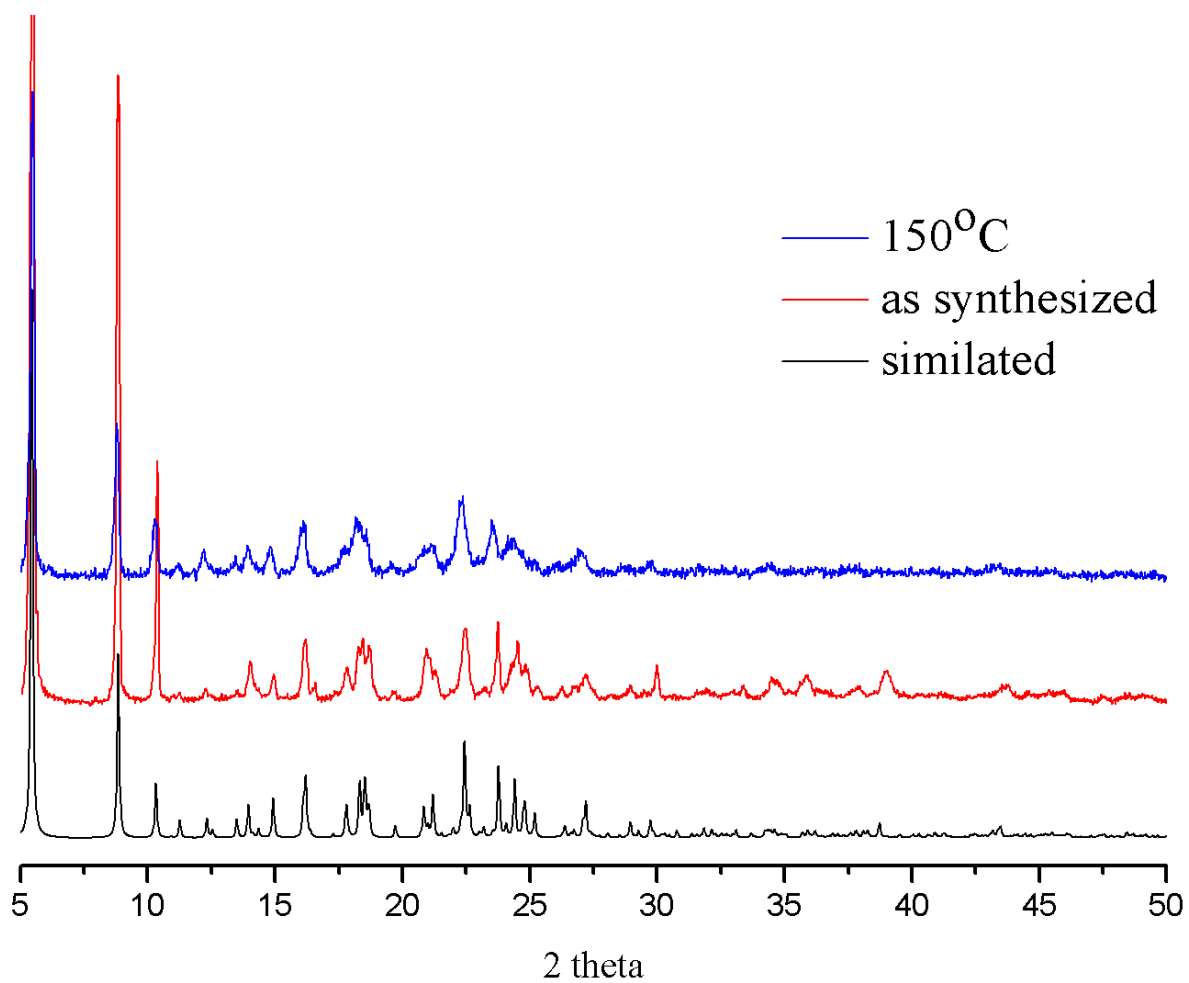

**Fig. S2.** Simulated (black) and as synthesized (red) PXRD patterns of complex **2**, and the pattern (blue) of the compound heated at 150 °C for 3hr.

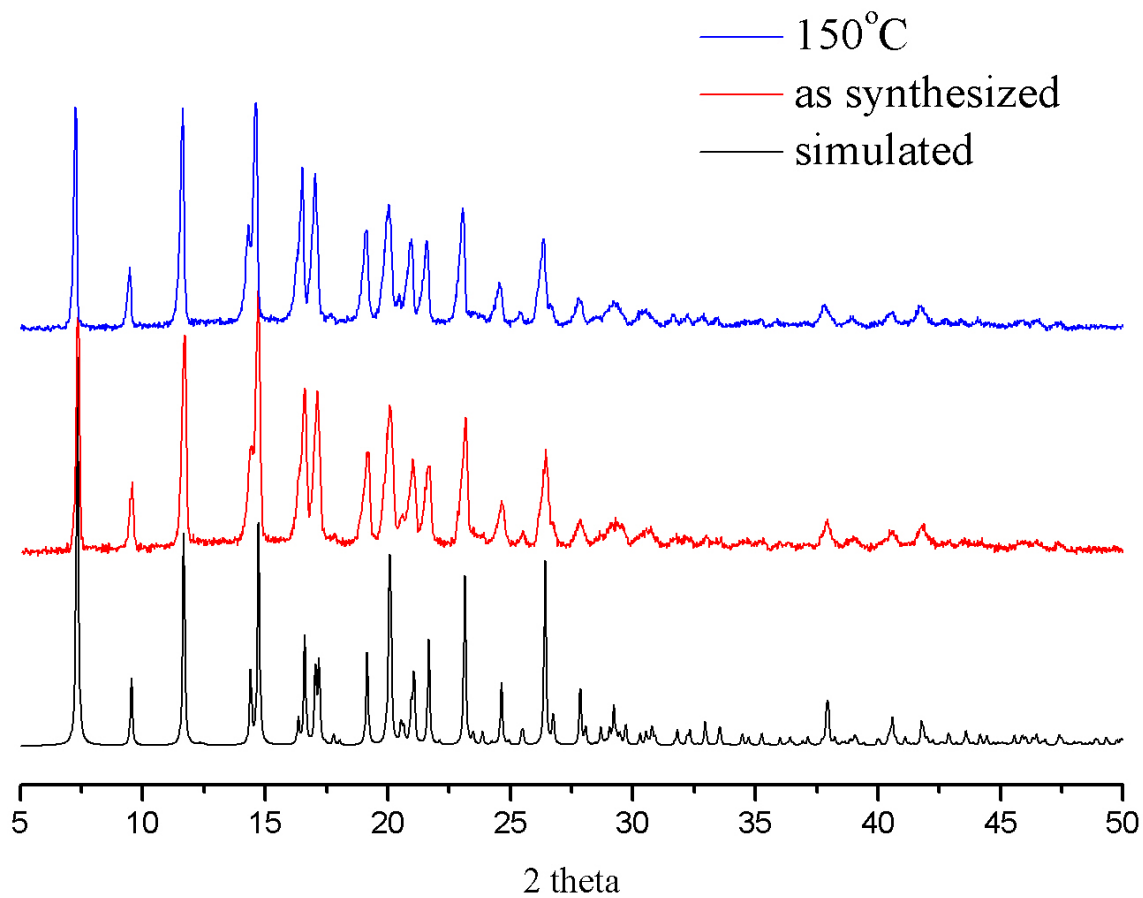

**Fig. S3.** Simulated (black) and as synthesized (red) PXRD patterns of complex **3**, and the pattern (blue) of the compound heated at 150 °C for 3hr.

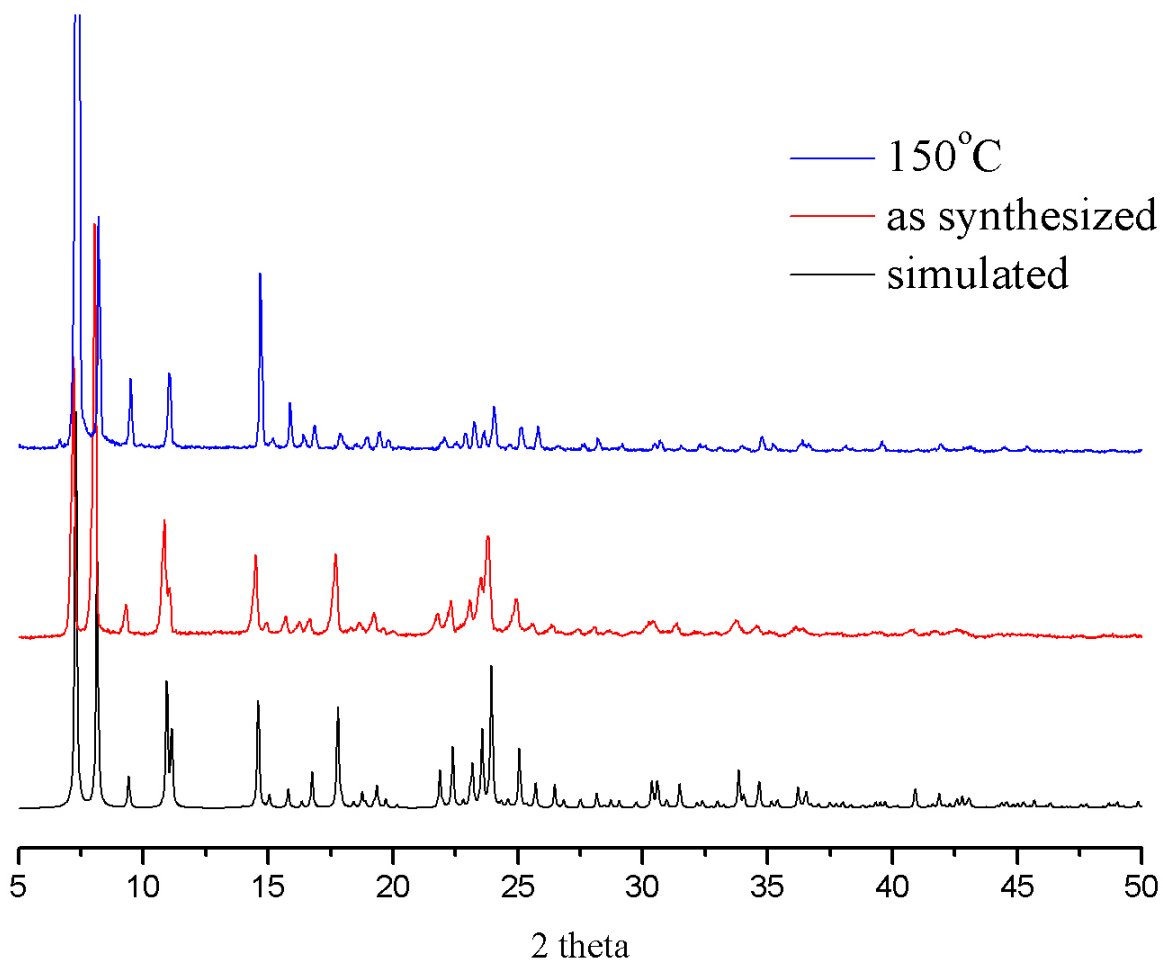

**Fig. S4.** A drawing showing the hydrogen bonds in **2**. Only two independent nets are shown for clarity.

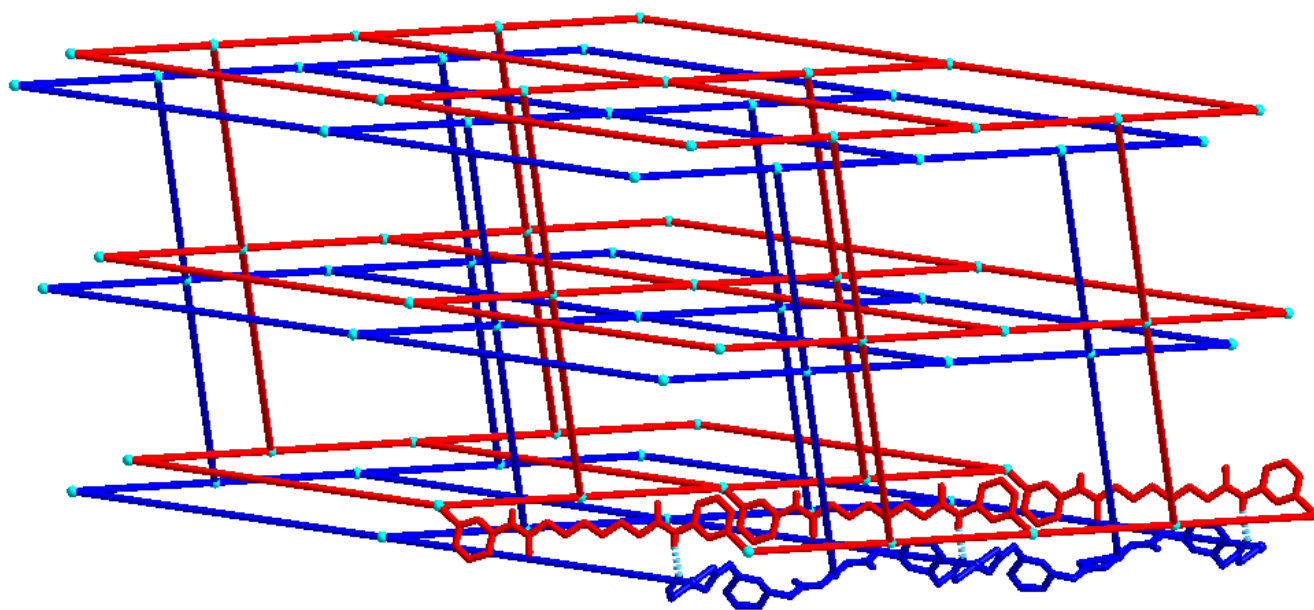

**Fig. S5.** A drawing showing the hydrogen bonds in **3**.

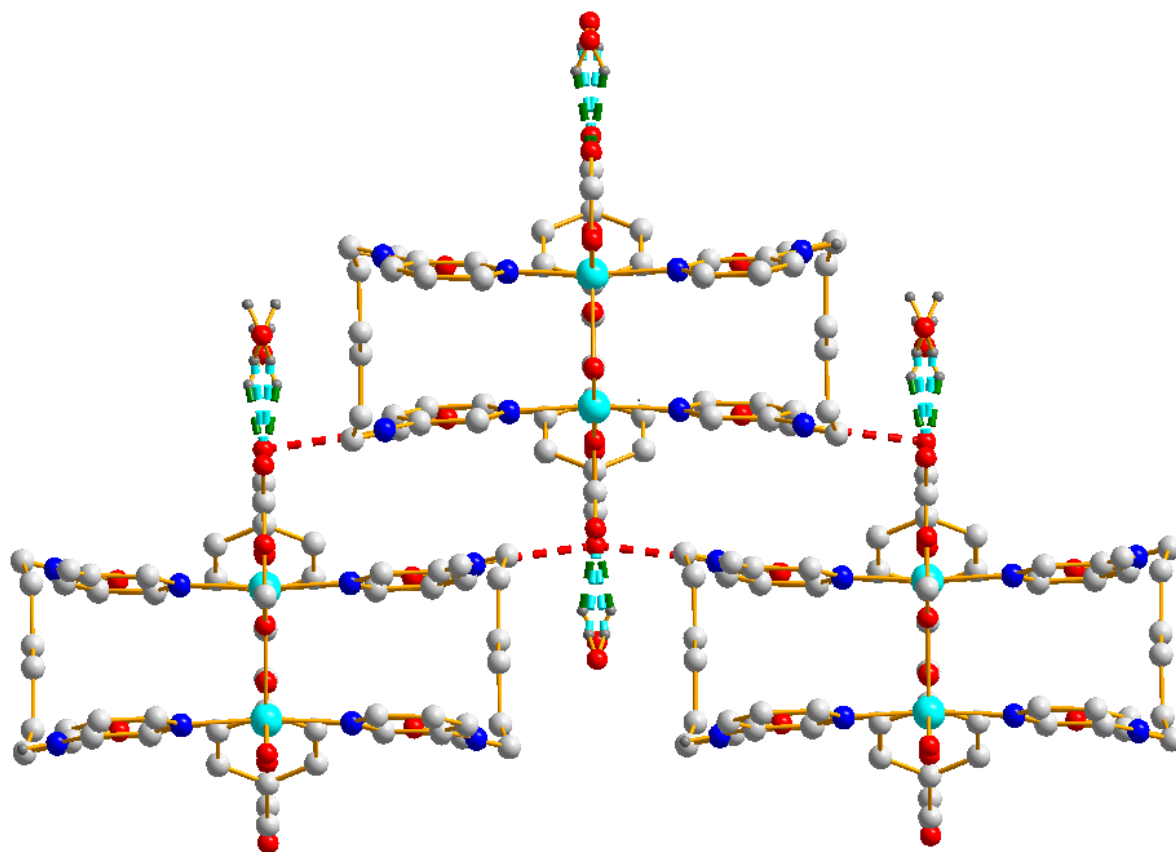

**Fig. S6.** TGA curves for **1** – **3**.

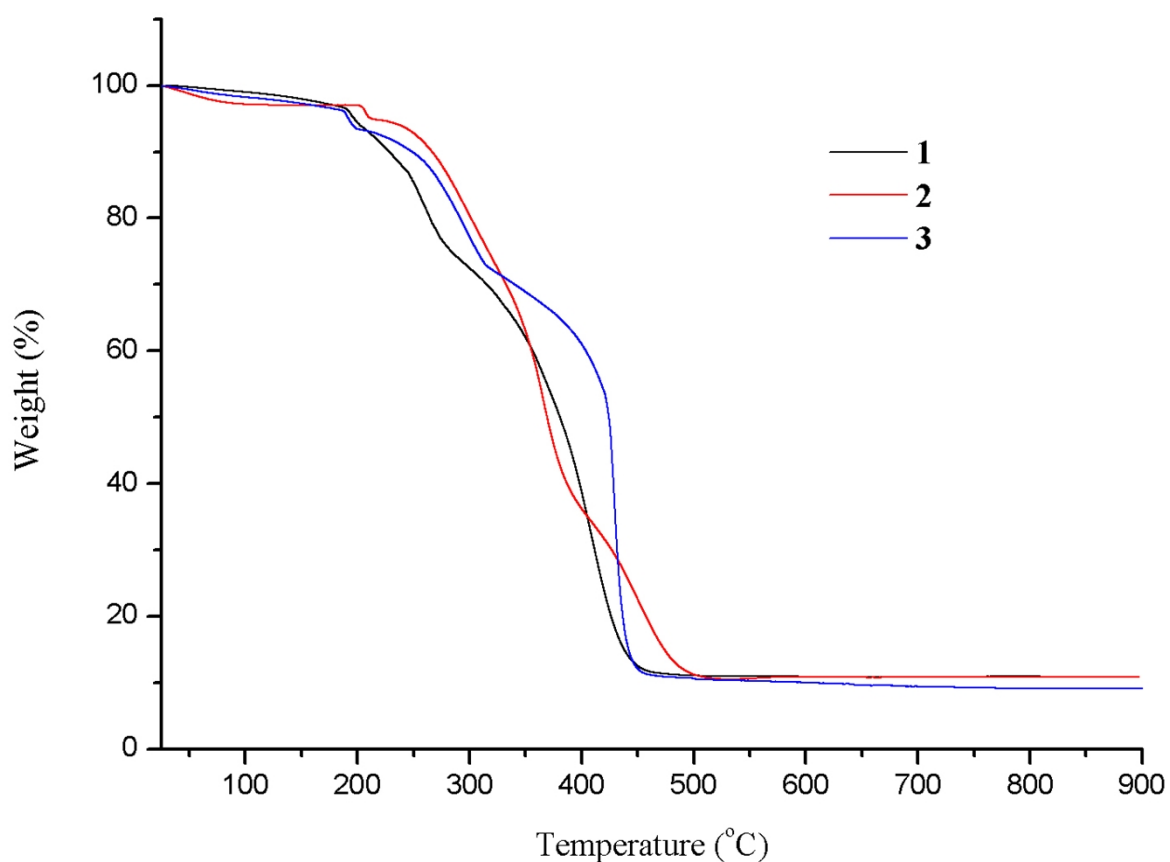

**Table S1.** Thermal properties of **1** - **3**.

| Complex  | Weight loss of H <sub>2</sub> O,<br>T, °C<br>(found/calc), % | Weight loss of ligands,<br>T, °C<br>(found/calc), % |
|----------|--------------------------------------------------------------|-----------------------------------------------------|
| <b>1</b> | 50 - 190<br>(3.53 / 5.02)                                    | 200 – 460<br>(84.96 / 86.41)                        |
| <b>2</b> | 45 – 200<br>(2.16 / 3.00)                                    | 200 – 510<br>(86.19 / 86.41)                        |
| <b>3</b> | 50 – 200<br>(6.56 / 5.83)                                    | 200 – 460<br>(83.26 / 83.39)                        |
